# Supplementary material for: Multiple Testing, Cut-Point Optimization, and Signs of Publication Bias in Prognostic FDG–PET Imaging Studies of Head and Neck and Lung Cancer: A Review and Meta-Analysis
Source: PubMed Central journal article supplement (PMC7761090; doi:10.3390/diagnostics10121030), 2020-12-01
Supplement: diagnostics-10-01030-s001.pdf [file diagnostics-10-01030-s001.pdf]

Figure S1: Forest plots for LC in HNSCC and NSCLC

**A HNSCC**

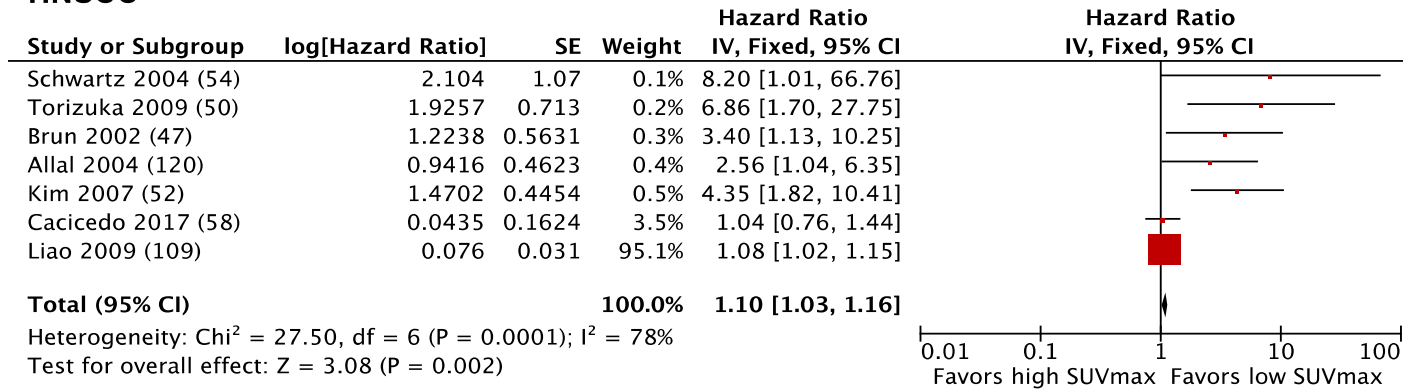

**B NSCLC**

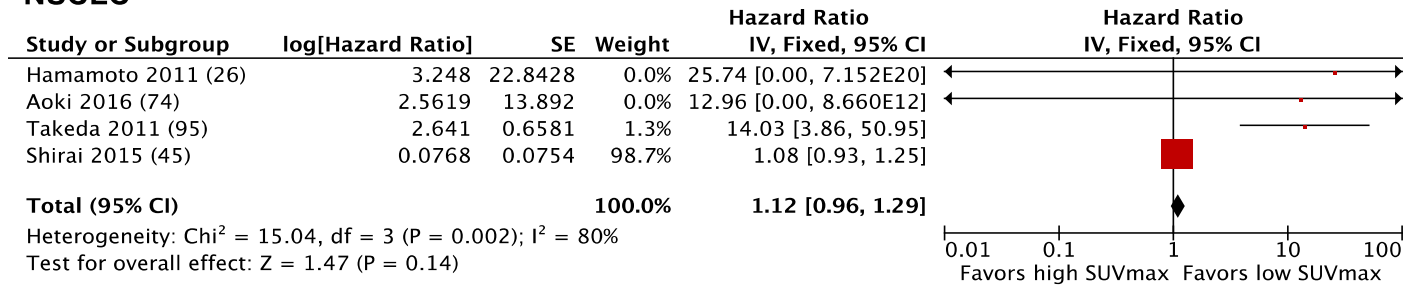

## Figure S2: Eggers regression versus meta-analysis

Linear regression of log hazard ratio versus standard error of log HR. Should have slope zero in the absence of publication bias. Intercept can be interpreted as “publication bias adjusted” estimate of the effect of FDG uptake in the limit of a large study

The regression has the type:

Regression:  $\ln(\text{HR}) \sim b_0 + b_1 * \text{Std. Error}(\ln \text{HR}) + \text{error}$

Full R code for this analysis available at <https://rpubs.com/IvanVogelius/Eggers>

### Head and Neck Cancer

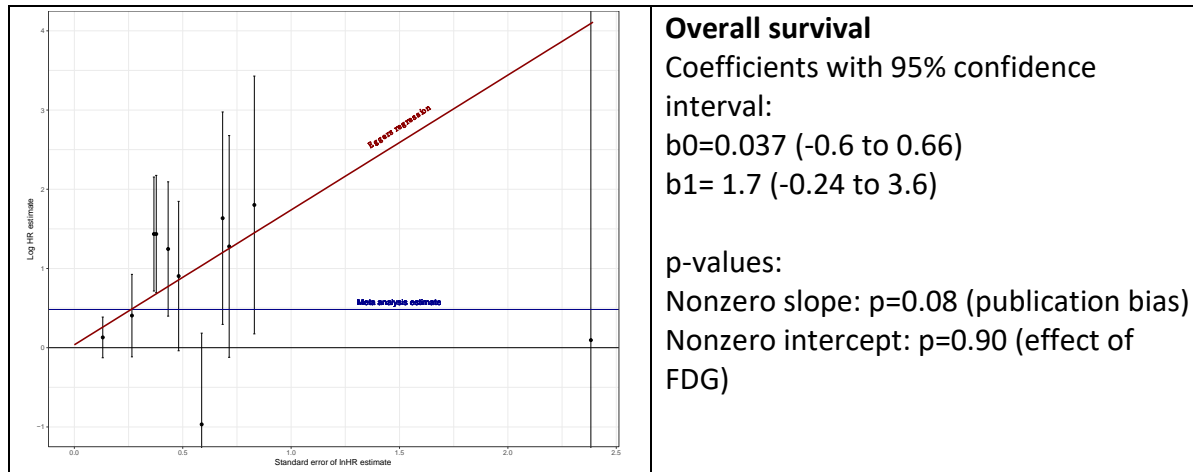

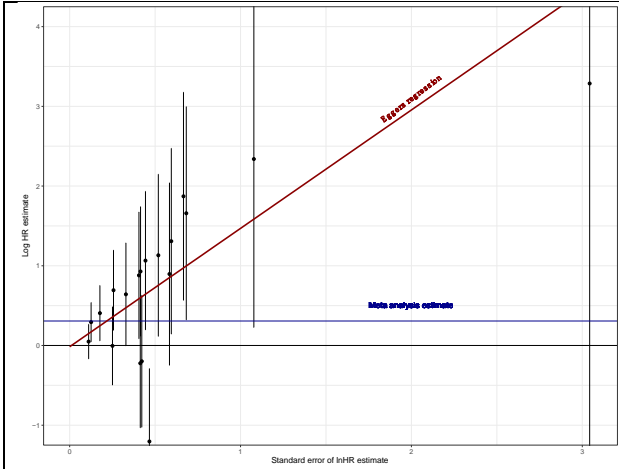

**Disease free survival**

Coefficients with 95% confidence interval:

$b_0 = -0.016$  (-0.34 to 0.31)

$b_1 = 1.48$  (0.28 to 2.69)

p-values:

Nonzero slope: **p=0.02** (publication bias)

Nonzero intercept: p=0.92 (effect of FDG)

Non-small cell lung cancer

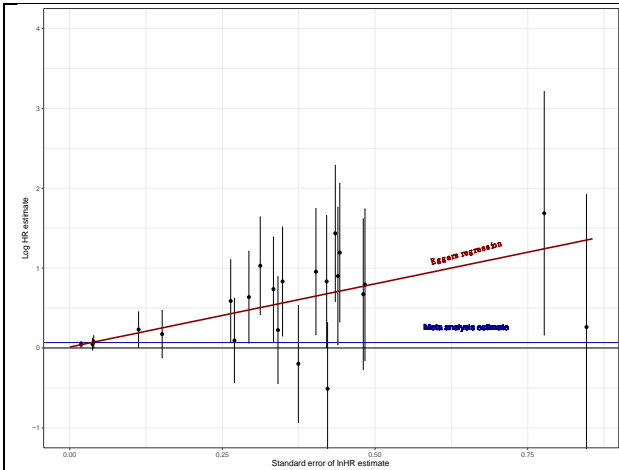

**Overall survival**

Coefficients with 95% confidence interval:

$b_0 = 0.012$  (-0.03 to 0.05)

$b_1 = 1.6$  (1.0 to 2.2)

p-values:

Nonzero slope: **p<0.001** (publication bias)

Nonzero intercept: p=0.56 (effect of FDG)

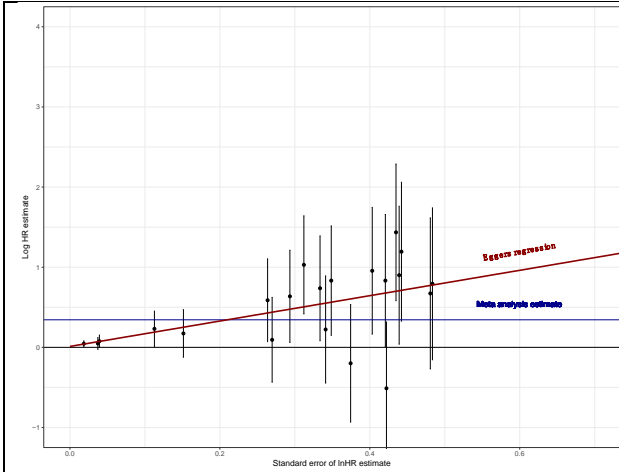

### Disease free survival

Coefficients with 95% confidence interval:

$b_0=0.015$  (-0.28 to 0.31)

$b_1= 1.67$  (0.42 to 2.9)

p-values:

Nonzero slope: **p=0.014** (publication bias)

Nonzero intercept: p=0.91 (effect of FDG)

**Table S1:** Data extracted from the included studies.

| HNSCC               | DFS                                    |                                        | OS                                |                                        |
|---------------------|----------------------------------------|----------------------------------------|-----------------------------------|----------------------------------------|
|                     | Univariate                             | Multivariate                           | Univariate                        | Multivariate                           |
| Akagunduz 2015      | <b>HR 1.49 (p=0.017)*</b>              |                                        | <b>HR 1.5 (p=0.022)*</b>          |                                        |
| Allal 2004          | HR=2.5 (p=0.005)*                      | <b>HR=1.9 (1.0-3.70, p=0.051)</b>      |                                   |                                        |
| Baschnagel 2015     |                                        | <b>HR=0.82 (0.36-1.87, p=0.64)</b>     |                                   |                                        |
| Cacicedo 2017       |                                        |                                        | <b>HR=1.1 (p=0.972)*</b>          |                                        |
| Chan 2017           | <b>HR=0.995 (0.507-1.952, p=0.987)</b> |                                        |                                   |                                        |
| Chung 2009          | HR=1.1 (0.42-2.69, p=0.88)             | <b>HR=0.8 (0.28-2.07, p=0.59)</b>      |                                   |                                        |
| Halfpenny 2002      |                                        |                                        | HR=4.4<br>(1.652-11.558, p=0.003) | <b>HR=4.2 (1.146-8.496, p=0.002)</b>   |
| Higgins 2012        | <b>HR=3.1 (p=0.029)*</b>               |                                        |                                   |                                        |
| Kim 2007            |                                        | <b>HR=3.7 (1.06-14.63, p=0.043)</b>    |                                   |                                        |
| Kitajima 2014       | <b>HR=1.05 (p=0.66)*</b>               |                                        |                                   |                                        |
| Komar 2014          |                                        |                                        | <b>HR=1.14 (p=0.317)*</b>         |                                        |
| Koyasu 2014         | <b>HR=2.45 (p=0.025)</b>               |                                        |                                   |                                        |
| Kunkel 2003         |                                        |                                        |                                   | <b>HR=5.13 (1.34-19.65, p=0.017)</b>   |
| Machtay 2009        | HR=2.9 (p=0.007)*                      | <b>HR=2.41 (1.1-5.32, p=0.03)</b>      | HR=2.4 (p=0.016)*                 | <b>HR=2.47 (0.98-6.26, p=0.06)</b>     |
| Minn 1997           |                                        |                                        | <b>HR=4.2 (1.6-11.0, p=0.002)</b> |                                        |
| Moon 2015           | <b>HR=26.754 (p=0.278)</b>             |                                        |                                   |                                        |
| Ng 2016             |                                        | <b>HR=2.532 (1.121-5.715, p=0.025)</b> |                                   | <b>HR=3.477 (1.505-8.031, p=0.004)</b> |
| Preda 2016          |                                        | <b>HR=10.37 (1.22-87.95, p=0.03)</b>   |                                   |                                        |
| Roh 2007            | <b>HR=2.0 (p=0.007)*</b>               |                                        |                                   |                                        |
| Schwartz 2004       | <b>HR=1.34 (p=0.02)*</b>               |                                        |                                   |                                        |
| Schwartz 2014       | <b>HR=0.30 (p=0.01)</b>                |                                        |                                   |                                        |
| Suzuki 2014         |                                        |                                        |                                   | <b>HR=6.06 (p&lt;0.03)</b>             |
| Suzuki-Shibata 2017 |                                        | <b>HR=5.25 (1.39-19.89, p=0.015)</b>   |                                   | <b>HR=3.59 (0.89-14.45, p=0.073)</b>   |
| Torizuka 2009       | <b>HR=6.5 (p=0.0051)*</b>              |                                        |                                   |                                        |
| Xie 2010            | <b>HR=2.9 (p=0.0163)*</b>              |                                        |                                   |                                        |
| <b>NSCLC</b>        |                                        |                                        |                                   |                                        |
| Ahuja 1998          |                                        |                                        | <b>HR=1.9 (p=0.0049)*</b>         | <b>HR=1.8 (p=0.026)</b>                |

|                    |                                 |                                        |                                 |                                        |
|--------------------|---------------------------------|----------------------------------------|---------------------------------|----------------------------------------|
| Borst 2005         |                                 |                                        | <b>HR=4.2 (p&lt;0.001)*</b>     |                                        |
| Carvalho 2013      |                                 |                                        | <b>HR=1.19 (p=0.25)*</b>        |                                        |
| Cerfolio 2005      |                                 |                                        | HR=2.5 (p<0.001)*               | <b>HR=2.8 (2.1-6.4)</b>                |
| Chen 2012          | HR=1.0 (0.59-1.54)              | <b>HR=1.2 (0.54-2.45)</b>              |                                 |                                        |
| Clarke 2012        | <b>HR=2.4 (p=0.04)*</b>         |                                        |                                 |                                        |
| Hofheinz 2016      | HR=1.85 (p=0.099)*              |                                        |                                 |                                        |
| Horne 2014         | <b>HR=2.79 (p=0.03)</b>         |                                        | <b>HR=2.09 (p=0.027)</b>        |                                        |
| Hyun 2015          | HR=1.71 (1.08-2.68, p=0.02)     | <b>HR=1.14 (0.67-1.92, p=0.618)</b>    | HR=1.79 (0.98-3.25, p=0.058)    | <b>HR=0.82 (0.39-1.70, p=0.596)</b>    |
| Imamura 2011       | HR=1.1 (p=0.609)*               |                                        | <b>HR=2.3 (p=0.017)*</b>        |                                        |
| Jiang 2018         |                                 |                                        |                                 | <b>HR=1.08 (0.75-1.57, p&lt;0.05)</b>  |
| Kohutek 2015       |                                 |                                        | HR=2.53 (p=0.0007)              | <b>HR=1.89 (p=0.03)</b>                |
| Lee 2012           |                                 |                                        | HR=1.8 (1.09-2.86)              | <b>HR=2.6 (1.67-4.17)</b>              |
| Nair 2013          | <b>HR=1.35 (p=0.0096)*</b>      |                                        | <b>HR=1.05 (p=0.1906)*</b>      |                                        |
| Nawara 2012        |                                 |                                        | <b>HR=1.3 (p=0.757)*</b>        |                                        |
| Pyka 2015          |                                 |                                        | <b>HR 1.96 (p=0.161)*</b>       |                                        |
| Sasaki 2005        | HR=5.1 (p<0.0001)               | <b>HR=4.3 (p=0.001)</b>                | HR=5.6 (p=0.02)                 | <b>HR=5.4 (p=0.03)</b>                 |
| Shirai 2017        | HR=1.32 (p=0.02)*               |                                        | <b>HR=1.26 (p=0.04)*</b>        |                                        |
| Sugawara 1999      |                                 |                                        | <b>HR=0.6 (p=0.2256)*</b>       |                                        |
| Takeda 2014        | HR=6.25 (p<0.01)                | <b>HR=5.94 (p&lt;0.01)</b>             | HR=4.18 (p<0.01)                | <b>HR=2.46 (p=0.04)</b>                |
| Takeda 2017        | <b>HR=2.12 (p=0.03)*</b>        |                                        |                                 |                                        |
| Ulger 2014         |                                 |                                        |                                 | <b>HR=1.046 (p=0.015)</b>              |
| Vansteenkiste 1999 |                                 |                                        | HR=3.9 (p=0.001)*               | <b>HR=3.3 (1.39-7.94, p=0.007)</b>     |
| Vesselle 2007      |                                 |                                        | HR=2.0 (1.15-3.5)               | <b>HR=1.3 (0.64-2.44)</b>              |
| Vu 2013            | <b>HR=2.21 (p=0.1)</b>          |                                        |                                 |                                        |
| Xiang 2012         | HR=3.3 (1.529-6.992)            | <b>HR=2.6 (1.115-6.158)</b>            | HR=2.7 (1.251-5.699)            | <b>HR=2.3 (1.006-5.474)</b>            |
| Yilmaz 2018        | HR=1.058 (0.635-1.763, p=0.828) | <b>HR=1.022 (0.578-1.805, p=0.941)</b> | HR=1.071 (0.641-1.791, p=0.792) | <b>HR=1.099 (0.649-1.860, p=0.726)</b> |

Data highlighted with bold were entered in RevMan. HR estimated from univariate log-rank test was only entered in RevMan if MVA was not performed. \*HR estimated from Kaplan-Meier plot.
